# Supplementary material
Source: publisher figshare collection journal article supplement (https://gsapubs.figshare.com/articles/dataset/_/12536027)
Supplement: Supplementary file 1 [file 1]

GSA Data Repository Item 2018028

Boschman, L.M., Molina Garza, R.S., Langereis, C.G., and van Hinsbergen, D.J.J., 2017, Paleomagnetic constraints on the kinematic relationship between the Guerrero terrane (Mexico) and North America since Early Cretaceous time: GSA Bulletin, <https://doi.org/10.1130/B31916.1>.

## **DATA REPOSITORY**

1. Table DR1. Zircon ages per grain
2. Table DR2. Paleomagnetic data of compiled database
3. site\_locations\_DR.kmz: GPS coordinates paleomagnetic sampling sites
4. pmag\_data\_DR.pmag: paleomagnetic data for implementation in paleomagnetism.org

TABLE DR1. U-Pb DETRITAL ZIRCON DATA

| Zircon                  |      |     |      | Corrected ratios                                                     |                                                                     |                                                                     |                                                                      |                                                       |                                                       |                                                        |      | Rho <sup>±2</sup> % disc. <sup>±2σ</sup> |    | Corrected ages (Ma) |     |       |      |     |     | Best age (Ma) ± 2s |  |
|-------------------------|------|-----|------|----------------------------------------------------------------------|---------------------------------------------------------------------|---------------------------------------------------------------------|----------------------------------------------------------------------|-------------------------------------------------------|-------------------------------------------------------|--------------------------------------------------------|------|------------------------------------------|----|---------------------|-----|-------|------|-----|-----|--------------------|--|
|                         |      |     |      | <sup>207</sup> Pb/ <sup>206</sup> Pb <sup>±</sup> err % <sup>±</sup> | <sup>207</sup> Pb/ <sup>235</sup> U <sup>±</sup> err % <sup>±</sup> | <sup>206</sup> Pb/ <sup>238</sup> U <sup>±</sup> err % <sup>±</sup> | <sup>208</sup> Pb/ <sup>232</sup> Th <sup>±</sup> err % <sup>±</sup> | <sup>206</sup> Pb/ <sup>238</sup> U ± 2s <sup>±</sup> | <sup>207</sup> Pb/ <sup>235</sup> U ± 2s <sup>±</sup> | <sup>207</sup> Pb/ <sup>206</sup> Pt ± 2s <sup>±</sup> |      |                                          |    |                     |     |       |      |     |     |                    |  |
| AL4DZ Alberca sandstone |      |     |      |                                                                      |                                                                     |                                                                     |                                                                      |                                                       |                                                       |                                                        |      |                                          |    |                     |     |       |      |     |     |                    |  |
| AL4DZ-81                | 446  | 361 | 0.81 | 0.05030                                                              | 6.8                                                                 | 0.12530                                                             | 6.1                                                                  | 0.01860                                               | 2.7                                                   | 0.00540                                                | 5.6  | 0.437                                    | 2  | 118.8               | 3.1 | 120.8 | 7.2  | 190 | 140 | 118.8 ± 3.1        |  |
| AL4DZ-77                | 423  | 290 | 0.69 | 0.05310                                                              | 6.6                                                                 | 0.13520                                                             | 7.1                                                                  | 0.01900                                               | 2.1                                                   | 0.00570                                                | 5.3  | 0.296                                    | 6  | 121.2               | 2.8 | 128.4 | 8.7  | 290 | 140 | 121.2 ± 2.8        |  |
| AL4DZ-70                | 640  | 435 | 0.68 | 0.04800                                                              | 5.4                                                                 | 0.12520                                                             | 5.0                                                                  | 0.01900                                               | 2.1                                                   | 0.00580                                                | 3.4  | 0.418                                    | -1 | 121.3               | 2.6 | 119.6 | 5.7  | 100 | 120 | 121.3 ± 2.6        |  |
| AL4DZ-113               | 398  | 271 | 0.68 | 0.04880                                                              | 5.5                                                                 | 0.13110                                                             | 5.3                                                                  | 0.01900                                               | 2.6                                                   | 0.00600                                                | 6.7  | 0.500                                    | 3  | 121.3               | 3.1 | 124.8 | 6.2  | 130 | 120 | 121.3 ± 3.1        |  |
| AL4DZ-54                | 724  | 670 | 0.93 | 0.04860                                                              | 5.1                                                                 | 0.13170                                                             | 5.1                                                                  | 0.01920                                               | 2.1                                                   | 0.00600                                                | 3.3  | 0.410                                    | 3  | 122.3               | 2.3 | 126.3 | 5.9  | 180 | 110 | 122.3 ± 2.3        |  |
| AL4DZ-38                | 415  | 255 | 0.61 | 0.05030                                                              | 6.8                                                                 | 0.13270                                                             | 6.3                                                                  | 0.01930                                               | 2.6                                                   | 0.00610                                                | 4.9  | 0.414                                    | 3  | 122.9               | 3.0 | 126.3 | 7.4  | 190 | 150 | 122.9 ± 3.0        |  |
| AL4DZ-10                | 348  | 145 | 0.42 | 0.04810                                                              | 6.7                                                                 | 0.12760                                                             | 6.4                                                                  | 0.01940                                               | 2.6                                                   | 0.00620                                                | 4.8  | 0.401                                    | -2 | 123.5               | 3.0 | 121.6 | 7.4  | 110 | 140 | 123.5 ± 3.0        |  |
| AL4DZ-61                | 510  | 335 | 0.66 | 0.05210                                                              | 4.6                                                                 | 0.13960                                                             | 4.6                                                                  | 0.01940                                               | 2.1                                                   | 0.00610                                                | 4.9  | 0.450                                    | 7  | 123.8               | 2.7 | 132.6 | 5.7  | 300 | 110 | 123.8 ± 2.7        |  |
| AL4DZ-96                | 886  | 525 | 0.59 | 0.04860                                                              | 4.7                                                                 | 0.13260                                                             | 4.4                                                                  | 0.01950                                               | 2.1                                                   | 0.00560                                                | 3.6  | 0.469                                    | 2  | 124.2               | 2.6 | 126.3 | 5.2  | 130 | 100 | 124.2 ± 2.6        |  |
| AL4DZ-57                | 312  | 136 | 0.44 | 0.05190                                                              | 6.7                                                                 | 0.13980                                                             | 5.9                                                                  | 0.01950                                               | 2.6                                                   | 0.00660                                                | 6.1  | 0.432                                    | 8  | 124.3               | 3.0 | 135.2 | 6.7  | 290 | 130 | 124.3 ± 3.0        |  |
| AL4DZ-36                | 416  | 188 | 0.45 | 0.04870                                                              | 5.3                                                                 | 0.13130                                                             | 4.6                                                                  | 0.01950                                               | 2.1                                                   | 0.00640                                                | 4.7  | 0.449                                    | 1  | 124.4               | 2.6 | 125.1 | 5.4  | 140 | 120 | 124.4 ± 2.6        |  |
| AL4DZ-31                | 418  | 242 | 0.58 | 0.04970                                                              | 6.2                                                                 | 0.13480                                                             | 4.8                                                                  | 0.01950                                               | 2.1                                                   | 0.00620                                                | 4.8  | 0.425                                    | 3  | 124.8               | 2.5 | 128.2 | 5.8  | 200 | 120 | 124.8 ± 2.5        |  |
| AL4DZ-44                | 353  | 244 | 0.69 | 0.04940                                                              | 6.5                                                                 | 0.13240                                                             | 6.2                                                                  | 0.01960                                               | 2.0                                                   | 0.00610                                                | 4.9  | 0.330                                    | 1  | 124.8               | 2.8 | 126.0 | 7.4  | 170 | 140 | 124.8 ± 2.8        |  |
| AL4DZ-82                | 780  | 907 | 1.16 | 0.05220                                                              | 4.6                                                                 | 0.14050                                                             | 4.1                                                                  | 0.01960                                               | 1.5                                                   | 0.00580                                                | 3.4  | 0.377                                    | 6  | 124.9               | 2.2 | 133.3 | 5.1  | 290 | 110 | 124.9 ± 2.2        |  |
| AL4DZ-73                | 613  | 594 | 0.97 | 0.04640                                                              | 5.6                                                                 | 0.12470                                                             | 5.1                                                                  | 0.01960                                               | 2.0                                                   | 0.00620                                                | 3.2  | 0.398                                    | -5 | 125.1               | 2.4 | 119.2 | 5.8  | 30  | 120 | 125.1 ± 2.4        |  |
| AL4DZ-87                | 408  | 257 | 0.63 | 0.04850                                                              | 7.0                                                                 | 0.13110                                                             | 6.3                                                                  | 0.01960                                               | 2.0                                                   | 0.00600                                                | 5.0  | 0.322                                    | 0  | 125.1               | 2.7 | 124.8 | 7.5  | 120 | 150 | 125.1 ± 2.7        |  |
| AL4DZ-30                | 257  | 141 | 0.55 | 0.05150                                                              | 7.0                                                                 | 0.13870                                                             | 7.0                                                                  | 0.01960                                               | 2.6                                                   | 0.00620                                                | 6.5  | 0.365                                    | 5  | 125.4               | 3.2 | 131.5 | 8.7  | 250 | 150 | 125.4 ± 3.2        |  |
| AL4DZ-29                | 905  | 669 | 0.74 | 0.04990                                                              | 5.4                                                                 | 0.13660                                                             | 5.1                                                                  | 0.01970                                               | 2.5                                                   | 0.00590                                                | 5.1  | 0.495                                    | 3  | 125.5               | 2.8 | 129.8 | 6.2  | 200 | 120 | 125.5 ± 2.8        |  |
| AL4DZ-88                | 193  | 93  | 0.48 | 0.05120                                                              | 9.0                                                                 | 0.13500                                                             | 9.6                                                                  | 0.01970                                               | 3.0                                                   | 0.00580                                                | 8.6  | 0.316                                    | 3  | 125.7               | 3.8 | 129.0 | 11.0 | 190 | 190 | 125.7 ± 3.8        |  |
| AL4DZ-93                | 414  | 294 | 0.71 | 0.05030                                                              | 5.4                                                                 | 0.13730                                                             | 5.1                                                                  | 0.01970                                               | 2.0                                                   | 0.00600                                                | 5.0  | 0.398                                    | 4  | 125.7               | 2.7 | 130.4 | 6.3  | 190 | 110 | 125.7 ± 2.7        |  |
| AL4DZ-89                | 707  | 555 | 0.79 | 0.04900                                                              | 5.5                                                                 | 0.13460                                                             | 5.3                                                                  | 0.01970                                               | 2.0                                                   | 0.00590                                                | 5.1  | 0.385                                    | 2  | 125.9               | 2.5 | 128.0 | 6.3  | 150 | 110 | 125.9 ± 2.5        |  |
| AL4DZ-105               | 365  | 215 | 0.59 | 0.05130                                                              | 7.0                                                                 | 0.13930                                                             | 6.4                                                                  | 0.01970                                               | 2.5                                                   | 0.00680                                                | 5.9  | 0.397                                    | 5  | 125.9               | 3.3 | 132.1 | 7.9  | 240 | 150 | 125.9 ± 3.3        |  |
| AL4DZ-62                | 589  | 426 | 0.72 | 0.05160                                                              | 5.4                                                                 | 0.13840                                                             | 4.7                                                                  | 0.01980                                               | 2.0                                                   | 0.00640                                                | 4.7  | 0.430                                    | 4  | 126.3               | 2.8 | 131.5 | 5.8  | 250 | 120 | 126.3 ± 2.8        |  |
| AL4DZ-50                | 457  | 190 | 0.42 | 0.05020                                                              | 6.8                                                                 | 0.13770                                                             | 5.8                                                                  | 0.01980                                               | 2.5                                                   | 0.00680                                                | 5.9  | 0.435                                    | 3  | 126.5               | 3.2 | 130.7 | 7.1  | 170 | 140 | 126.5 ± 3.2        |  |
| AL4DZ-24                | 625  | 363 | 0.58 | 0.05170                                                              | 5.6                                                                 | 0.14050                                                             | 5.5                                                                  | 0.01980                                               | 2.5                                                   | 0.00670                                                | 4.5  | 0.461                                    | 6  | 126.6               | 3.1 | 134.3 | 7.0  | 260 | 130 | 126.6 ± 3.1        |  |
| AL4DZ-79                | 370  | 278 | 0.75 | 0.04930                                                              | 6.1                                                                 | 0.13590                                                             | 5.7                                                                  | 0.01990                                               | 2.5                                                   | 0.00600                                                | 5.0  | 0.443                                    | 2  | 126.8               | 3.0 | 129.1 | 6.9  | 160 | 120 | 126.8 ± 3.0        |  |
| AL4DZ-39                | 157  | 74  | 0.47 | 0.05290                                                              | 9.8                                                                 | 0.14700                                                             | 8.8                                                                  | 0.01990                                               | 3.5                                                   | 0.00630                                                | 7.9  | 0.398                                    | 8  | 126.9               | 4.2 | 138.0 | 12.0 | 330 | 210 | 126.9 ± 4.2        |  |
| AL4DZ-16                | 489  | 385 | 0.79 | 0.04700                                                              | 7.2                                                                 | 0.12650                                                             | 6.7                                                                  | 0.01990                                               | 2.0                                                   | 0.00620                                                | 4.8  | 0.299                                    | -5 | 127.2               | 2.6 | 120.6 | 7.6  | 30  | 150 | 127.2 ± 2.6        |  |
| AL4DZ-85                | 709  | 423 | 0.60 | 0.05070                                                              | 5.3                                                                 | 0.14000                                                             | 5.1                                                                  | 0.01990                                               | 2.0                                                   | 0.00650                                                | 4.6  | 0.396                                    | 4  | 127.2               | 2.8 | 132.9 | 6.4  | 210 | 120 | 127.2 ± 2.8        |  |
| AL4DZ-112               | 665  | 466 | 0.70 | 0.04960                                                              | 5.2                                                                 | 0.14140                                                             | 4.3                                                                  | 0.01990                                               | 2.0                                                   | 0.00670                                                | 4.5  | 0.466                                    | 5  | 127.2               | 2.6 | 134.1 | 5.4  | 180 | 120 | 127.2 ± 2.6        |  |
| AL4DZ-20                | 323  | 206 | 0.64 | 0.04920                                                              | 6.1                                                                 | 0.13480                                                             | 5.6                                                                  | 0.02000                                               | 2.5                                                   | 0.00640                                                | 4.7  | 0.443                                    | 1  | 127.4               | 2.9 | 128.2 | 6.8  | 150 | 130 | 127.4 ± 2.9        |  |
| AL4DZ-28                | 193  | 62  | 0.32 | 0.05100                                                              | 9.0                                                                 | 0.14200                                                             | 8.5                                                                  | 0.02000                                               | 2.5                                                   | 0.00640                                                | 9.4  | 0.296                                    | 5  | 127.4               | 3.1 | 134.0 | 11.0 | 210 | 190 | 127.4 ± 3.1        |  |
| AL4DZ-48                | 195  | 95  | 0.49 | 0.05390                                                              | 10.2                                                                | 0.14800                                                             | 9.5                                                                  | 0.02000                                               | 3.0                                                   | 0.00670                                                | 9.0  | 0.317                                    | 9  | 127.5               | 4.0 | 140.0 | 12.0 | 300 | 210 | 127.5 ± 4.0        |  |
| AL4DZ-55                | 271  | 150 | 0.55 | 0.04880                                                              | 7.6                                                                 | 0.13390                                                             | 6.7                                                                  | 0.02000                                               | 3.0                                                   | 0.00610                                                | 6.6  | 0.446                                    | 0  | 127.5               | 3.5 | 127.3 | 8.1  | 110 | 160 | 127.5 ± 3.5        |  |
| AL4DZ-25                | 313  | 148 | 0.47 | 0.04840                                                              | 7.9                                                                 | 0.13600                                                             | 7.4                                                                  | 0.02000                                               | 2.5                                                   | 0.00640                                                | 6.3  | 0.340                                    | 2  | 127.6               | 3.3 | 130.6 | 9.3  | 140 | 170 | 127.6 ± 3.3        |  |
| AL4DZ-45                | 265  | 125 | 0.47 | 0.05050                                                              | 7.5                                                                 | 0.13900                                                             | 7.2                                                                  | 0.02000                                               | 2.5                                                   | 0.00640                                                | 6.3  | 0.348                                    | 5  | 127.6               | 3.0 | 134.6 | 8.7  | 210 | 150 | 127.6 ± 3.0        |  |
| AL4DZ-2                 | 184  | 54  | 0.29 | 0.05050                                                              | 9.1                                                                 | 0.13900                                                             | 9.4                                                                  | 0.02000                                               | 4.0                                                   | 0.00650                                                | 10.8 | 0.428                                    | 3  | 127.7               | 5.1 | 132.0 | 12.0 | 170 | 190 | 127.7 ± 5.1        |  |
| AL4DZ-5                 | 547  | 417 | 0.76 | 0.05180                                                              | 5.4                                                                 | 0.14110                                                             | 4.7                                                                  | 0.02000                                               | 2.0                                                   | 0.00610                                                | 4.9  | 0.421                                    | 4  | 127.8               | 2.7 | 133.8 | 5.9  | 260 | 120 | 127.8 ± 2.7        |  |
| AL4DZ-107               | 304  | 157 | 0.52 | 0.05420                                                              | 6.6                                                                 | 0.14760                                                             | 6.3                                                                  | 0.02010                                               | 2.5                                                   | 0.00710                                                | 7.0  | 0.395                                    | 9  | 128.1               | 3.0 | 140.9 | 7.9  | 390 | 140 | 128.1 ± 3.0        |  |
| AL4DZ-108               | 418  | 315 | 0.75 | 0.05020                                                              | 7.4                                                                 | 0.14000                                                             | 6.9                                                                  | 0.02010                                               | 2.5                                                   | 0.00660                                                | 4.5  | 0.359                                    | 3  | 128.1               | 3.0 | 132.6 | 8.7  | 190 | 160 | 128.1 ± 3.0        |  |
| AL4DZ-6                 | 275  | 122 | 0.44 | 0.05020                                                              | 7.8                                                                 | 0.13700                                                             | 7.3                                                                  | 0.02010                                               | 2.5                                                   | 0.00610                                                | 6.6  | 0.341                                    | 3  | 128.2               | 3.3 | 131.9 | 9.8  | 250 | 170 | 128.2 ± 3.3        |  |
| AL4DZ-72                | 991  | 741 | 0.75 | 0.04830                                                              | 5.0                                                                 | 0.13220                                                             | 3.9                                                                  | 0.02010                                               | 2.0                                                   | 0.00600                                                | 3.3  | 0.506                                    | -2 | 128.4               | 2.6 | 126.0 | 4.6  | 100 | 110 | 128.4 ± 2.6        |  |
| AL4DZ-63                | 386  | 312 | 0.81 | 0.04600                                                              | 6.5                                                                 | 0.12630                                                             | 6.3                                                                  | 0.02010                                               | 2.5                                                   | 0.00630                                                | 4.8  | 0.393                                    | -7 | 128.6               | 2.9 | 120.5 | 7.2  | 0   | 130 | 128.6 ± 2.9        |  |
| AL4DZ-71                | 564  | 350 | 0.62 | 0.05100                                                              | 4.9                                                                 | 0.14260                                                             | 3.8                                                                  | 0.02020                                               | 2.0                                                   | 0.00650                                                | 4.6  | 0.523                                    | 5  | 128.6               | 2.8 | 135.2 | 4.8  | 220 | 110 | 128.6 ± 2.8        |  |
| AL4DZ-47                | 1090 | 755 | 0.69 | 0.04930                                                              | 4.3                                                                 | 0.13690                                                             | 3.8                                                                  | 0.02020                                               | 2.0                                                   | 0.00630                                                | 3.2  | 0.521                                    | 1  | 128.7               | 2.3 | 130.1 | 4.6  | 161 | 97  | 128.7 ± 2.3        |  |
| AL4DZ-41                | 224  | 105 | 0.47 | 0.05270                                                              | 7.4                                                                 | 0.14800                                                             | 7.4                                                                  | 0.02020                                               | 3.0                                                   | 0.00690                                                | 5.8  | 0.400                                    | 8  | 128.9               | 3.6 | 139.7 | 9.6  | 320 | 150 | 128.9 ± 3.6        |  |
| AL4DZ-43                | 222  | 106 | 0.48 | 0.05030                                                              | 6.8                                                                 | 0.14200                                                             | 6.4                                                                  | 0.02020                                               | 3.0                                                   | 0.00670                                                | 6.0  | 0.463                                    | 4  | 128.9               | 3.7 | 134.5 | 8.1  | 250 | 150 | 128.9 ± 3.7        |  |
| AL4DZ-76                | 197  | 62  | 0.31 | 0.04780                                                              | 7.5                                                                 | 0.13360                                                             | 7.3                                                                  | 0.02020                                               | 3.0                                                   | 0.00690                                                | 8.7  | 0.409                                    | -2 | 129.0               | 3.6 | 127.0 | 8.7  | 90  | 160 | 129.0 ± 3.6        |  |
| AL4DZ-12                | 1060 | 254 | 0.24 | 0.04880                                                              | 4.3                                                                 | 0.13810                                                             | 4.1                                                                  | 0.02020                                               | 2.0                                                   | 0.00680                                                | 4.4  | 0.488                                    | 2  | 129.2               | 2.3 | 131.2 | 4.9  | 160 | 100 | 129.2 ± 2.3        |  |
| AL4DZ-64                | 442  | 380 | 0.86 | 0.04940                                                              | 6.7                                                                 | 0.13770                                                             | 6.1                                                                  | 0.02020                                               | 2.5                                                   |                                                        |      |                                          |    |                     |     |       |      |     |     |                    |  |

|                                   |      |     |      |         |      |         |      |         |     |         |      |       |    |       |     |       |      |     |     |             |
|-----------------------------------|------|-----|------|---------|------|---------|------|---------|-----|---------|------|-------|----|-------|-----|-------|------|-----|-----|-------------|
| AL4DZ-60                          | 468  | 247 | 0.53 | 0.05250 | 5.1  | 0.14720 | 4.4  | 0.02050 | 2.0 | 0.00750 | 4.0  | 0.442 | 6  | 130.6 | 2.6 | 139.3 | 5.8  | 280 | 110 | 130.6 ± 2.6 |
| AL4DZ-14                          | 451  | 378 | 0.84 | 0.04790 | 6.3  | 0.13950 | 5.1  | 0.02050 | 2.0 | 0.00630 | 4.8  | 0.383 | 1  | 130.8 | 2.7 | 132.4 | 6.3  | 140 | 130 | 130.8 ± 2.7 |
| AL4DZ-83                          | 339  | 114 | 0.34 | 0.04480 | 6.7  | 0.12730 | 6.7  | 0.02050 | 2.4 | 0.00670 | 7.5  | 0.365 | -8 | 130.8 | 3.0 | 121.3 | 7.7  | 10  | 140 | 130.8 ± 3.0 |
| AL4DZ-99                          | 420  | 164 | 0.39 | 0.04950 | 5.9  | 0.13960 | 6.0  | 0.02050 | 2.4 | 0.00620 | 6.5  | 0.405 | 1  | 130.9 | 3.1 | 132.4 | 7.5  | 150 | 130 | 130.9 ± 3.1 |
| AL4DZ-109                         | 145  | 45  | 0.31 | 0.05090 | 14.3 | 0.14000 | 13.6 | 0.02060 | 2.9 | 0.00740 | 10.8 | 0.215 | 1  | 131.1 | 4.0 | 132.0 | 17.0 | 90  | 270 | 131.1 ± 4.0 |
| AL4DZ-26                          | 466  | 207 | 0.44 | 0.05310 | 7.0  | 0.15010 | 6.5  | 0.02060 | 2.4 | 0.00660 | 4.5  | 0.376 | 7  | 131.3 | 3.2 | 141.6 | 8.6  | 300 | 150 | 131.3 ± 3.2 |
| AL4DZ-59                          | 173  | 81  | 0.47 | 0.05240 | 9.4  | 0.15200 | 9.2  | 0.02060 | 2.9 | 0.00680 | 7.4  | 0.316 | 9  | 131.3 | 4.1 | 145.0 | 12.0 | 260 | 200 | 131.3 ± 4.1 |
| AL4DZ-86                          | 533  | 415 | 0.78 | 0.05120 | 6.3  | 0.14270 | 5.6  | 0.02060 | 2.4 | 0.00610 | 4.9  | 0.433 | 3  | 131.3 | 3.1 | 135.2 | 7.1  | 220 | 130 | 131.3 ± 3.1 |
| AL4DZ-114                         | 177  | 119 | 0.67 | 0.04870 | 9.4  | 0.14000 | 8.6  | 0.02060 | 2.9 | 0.00660 | 7.6  | 0.340 | 1  | 131.3 | 3.7 | 133.0 | 11.0 | 110 | 180 | 131.3 ± 3.7 |
| AL4DZ-17                          | 241  | 75  | 0.31 | 0.05430 | 7.6  | 0.15100 | 6.6  | 0.02060 | 2.4 | 0.00750 | 6.7  | 0.367 | 9  | 131.4 | 3.2 | 144.0 | 9.4  | 350 | 170 | 131.4 ± 3.2 |
| AL4DZ-90                          | 964  | 672 | 0.70 | 0.04920 | 4.1  | 0.14410 | 3.9  | 0.02060 | 1.9 | 0.00660 | 4.5  | 0.500 | 4  | 131.5 | 2.7 | 136.6 | 4.9  | 175 | 92  | 131.5 ± 2.7 |
| AL4DZ-95                          | 405  | 290 | 0.72 | 0.04850 | 6.6  | 0.14010 | 5.8  | 0.02060 | 2.4 | 0.00650 | 4.6  | 0.420 | 1  | 131.6 | 3.1 | 132.9 | 7.2  | 130 | 130 | 131.6 ± 3.1 |
| AL4DZ-53                          | 363  | 159 | 0.44 | 0.04730 | 7.8  | 0.13600 | 7.4  | 0.02070 | 2.4 | 0.00660 | 6.1  | 0.329 | -2 | 131.9 | 3.4 | 129.0 | 9.2  | 100 | 160 | 131.9 ± 3.4 |
| AL4DZ-58                          | 485  | 471 | 0.97 | 0.05000 | 5.8  | 0.14090 | 4.9  | 0.02070 | 2.4 | 0.00660 | 4.5  | 0.493 | 1  | 131.9 | 3.0 | 133.7 | 6.2  | 170 | 120 | 131.9 ± 3.0 |
| AL4DZ-11                          | 700  | 341 | 0.49 | 0.04800 | 4.8  | 0.14020 | 4.1  | 0.02070 | 1.9 | 0.00660 | 4.5  | 0.475 | 1  | 132.0 | 2.5 | 133.1 | 5.0  | 120 | 110 | 132.0 ± 2.5 |
| AL4DZ-9                           | 150  | 65  | 0.43 | 0.05490 | 10.2 | 0.15600 | 9.6  | 0.02070 | 3.4 | 0.00750 | 9.3  | 0.352 | 9  | 132.2 | 4.3 | 146.0 | 13.0 | 340 | 200 | 132.2 ± 4.3 |
| AL4DZ-7                           | 401  | 179 | 0.45 | 0.05330 | 6.4  | 0.15450 | 5.1  | 0.02080 | 2.4 | 0.00760 | 3.9  | 0.470 | 9  | 132.6 | 3.0 | 145.6 | 7.0  | 300 | 140 | 132.6 ± 3.0 |
| AL4DZ-74                          | 215  | 114 | 0.53 | 0.05110 | 6.8  | 0.14800 | 6.8  | 0.02090 | 2.9 | 0.00710 | 5.6  | 0.425 | 4  | 133.6 | 4.0 | 139.7 | 9.0  | 240 | 140 | 133.6 ± 4.0 |
| AL4DZ-67                          | 622  | 374 | 0.60 | 0.04860 | 5.6  | 0.14170 | 5.4  | 0.02100 | 1.9 | 0.00660 | 4.5  | 0.351 | 0  | 133.7 | 2.6 | 134.3 | 6.8  | 130 | 120 | 133.7 ± 2.6 |
| AL4DZ-8                           | 627  | 408 | 0.65 | 0.04890 | 4.5  | 0.13860 | 4.3  | 0.02100 | 1.9 | 0.00640 | 4.7  | 0.447 | -2 | 134.1 | 2.8 | 131.7 | 5.3  | 132 | 99  | 134.1 ± 2.8 |
| AL4DZ-46                          | 943  | 514 | 0.55 | 0.05020 | 4.2  | 0.14630 | 3.6  | 0.02100 | 1.9 | 0.00730 | 2.7  | 0.526 | 3  | 134.1 | 2.3 | 138.5 | 4.7  | 201 | 96  | 134.1 ± 2.3 |
| AL4DZ-92                          | 902  | 683 | 0.76 | 0.05080 | 4.1  | 0.14720 | 3.6  | 0.02100 | 1.9 | 0.00670 | 3.0  | 0.529 | 4  | 134.1 | 2.6 | 139.3 | 4.7  | 229 | 87  | 134.1 ± 2.6 |
| AL4DZ-103                         | 607  | 386 | 0.64 | 0.04770 | 6.1  | 0.13850 | 5.5  | 0.02100 | 1.9 | 0.00680 | 4.4  | 0.347 | -1 | 134.1 | 2.8 | 132.5 | 6.6  | 90  | 130 | 134.1 ± 2.8 |
| AL4DZ-75                          | 320  | 103 | 0.32 | 0.04810 | 7.7  | 0.13920 | 6.8  | 0.02110 | 2.8 | 0.00680 | 7.4  | 0.417 | -1 | 134.5 | 3.5 | 133.3 | 8.7  | 70  | 150 | 134.5 ± 3.5 |
| AL4DZ-69                          | 311  | 162 | 0.52 | 0.05050 | 9.1  | 0.14400 | 8.3  | 0.02110 | 2.8 | 0.00680 | 5.9  | 0.341 | 1  | 134.7 | 3.7 | 136.0 | 11.0 | 180 | 190 | 134.7 ± 3.7 |
| AL4DZ-40                          | 328  | 165 | 0.50 | 0.05060 | 6.7  | 0.14650 | 6.2  | 0.02120 | 2.8 | 0.00650 | 6.2  | 0.456 | 3  | 135.0 | 3.5 | 138.5 | 8.0  | 210 | 150 | 135.0 ± 3.5 |
| AL4DZ-78                          | 87   | 41  | 0.47 | 0.05090 | 14.9 | 0.15400 | 13.0 | 0.02120 | 4.2 | 0.00690 | 10.1 | 0.327 | 5  | 135.4 | 5.5 | 143.0 | 18.0 | 190 | 280 | 135.4 ± 5.5 |
| AL4DZ-106                         | 1109 | 666 | 0.60 | 0.05110 | 4.1  | 0.14790 | 3.9  | 0.02120 | 1.9 | 0.00670 | 4.5  | 0.490 | 3  | 135.4 | 2.3 | 139.9 | 5.0  | 229 | 91  | 135.4 ± 2.3 |
| AL4DZ-68                          | 853  | 388 | 0.45 | 0.04740 | 4.4  | 0.13990 | 3.9  | 0.02130 | 1.9 | 0.00670 | 4.5  | 0.487 | -2 | 135.5 | 2.7 | 132.9 | 4.8  | 95  | 95  | 135.5 ± 2.7 |
| AL4DZ-32                          | 309  | 261 | 0.84 | 0.05130 | 7.0  | 0.15300 | 7.2  | 0.02170 | 3.2 | 0.00830 | 7.2  | 0.449 | 4  | 138.6 | 4.4 | 144.0 | 9.4  | 240 | 150 | 138.6 ± 4.4 |
| AL4DZ-91                          | 324  | 165 | 0.51 | 0.04940 | 5.9  | 0.14840 | 5.5  | 0.02180 | 3.2 | 0.00710 | 5.6  | 0.588 | 1  | 139.0 | 4.5 | 140.2 | 7.2  | 140 | 120 | 139.0 ± 4.5 |
| AL4DZ-21                          | 150  | 72  | 0.48 | 0.04950 | 12.7 | 0.13800 | 12.3 | 0.02180 | 3.7 | 0.00690 | 8.7  | 0.298 | -5 | 139.1 | 4.8 | 133.0 | 15.0 | 70  | 240 | 139.1 ± 4.8 |
| <b>&gt;10% discordant zircons</b> |      |     |      |         |      |         |      |         |     |         |      |       |    |       |     |       |      |     |     |             |
| AL4DZ-42                          | 229  | 97  | 0.42 | 0.06570 | 8.8  | 0.18000 | 8.9  | 0.01990 | 3.0 | 0.00830 | 6.0  | 0.339 | 24 | 127.3 | 3.8 | 167.0 | 14.0 | 800 | 190 | 127.3 ± 3.8 |
| AL4DZ-98                          | 359  | 308 | 0.86 | 0.05840 | 6.2  | 0.16040 | 5.9  | 0.02010 | 2.5 | 0.00650 | 4.6  | 0.420 | 15 | 128.1 | 3.2 | 150.7 | 8.3  | 500 | 140 | 128.1 ± 3.2 |
| AL4DZ-15                          | 426  | 179 | 0.42 | 0.06140 | 5.5  | 0.16910 | 5.0  | 0.02010 | 2.5 | 0.00790 | 5.1  | 0.495 | 19 | 128.3 | 2.9 | 158.4 | 7.4  | 630 | 120 | 128.3 ± 2.9 |
| AL4DZ-23                          | 369  | 124 | 0.34 | 0.05930 | 5.7  | 0.16390 | 5.7  | 0.02020 | 2.5 | 0.00820 | 6.1  | 0.436 | 16 | 128.9 | 3.0 | 153.8 | 8.1  | 530 | 130 | 128.9 ± 3.0 |
| AL4DZ-34                          | 109  | 62  | 0.57 | 0.05490 | 10.9 | 0.15600 | 10.9 | 0.02020 | 3.5 | 0.00640 | 9.4  | 0.318 | 12 | 128.9 | 4.7 | 146.0 | 15.0 | 400 | 230 | 128.9 ± 4.7 |
| AL4DZ-65                          | 190  | 95  | 0.50 | 0.06640 | 8.9  | 0.18400 | 8.2  | 0.02020 | 3.0 | 0.00770 | 6.5  | 0.364 | 24 | 129.0 | 4.0 | 170.0 | 13.0 | 770 | 190 | 129.0 ± 4.0 |
| AL4DZ-97                          | 176  | 81  | 0.46 | 0.05910 | 8.1  | 0.16300 | 7.4  | 0.02040 | 2.9 | 0.00740 | 9.5  | 0.400 | 16 | 130.0 | 4.0 | 155.0 | 11.0 | 550 | 180 | 130.0 ± 4.0 |
| AL4DZ-4                           | 150  | 73  | 0.49 | 0.06270 | 8.9  | 0.17500 | 8.0  | 0.02050 | 2.9 | 0.00820 | 8.5  | 0.366 | 20 | 130.9 | 3.9 | 163.0 | 12.0 | 620 | 190 | 130.9 ± 3.9 |
| AL4DZ-1                           | 335  | 175 | 0.52 | 0.06050 | 8.8  | 0.17300 | 8.7  | 0.02050 | 2.4 | 0.00800 | 6.3  | 0.281 | 20 | 131.0 | 3.3 | 163.0 | 13.0 | 600 | 180 | 131.0 ± 3.3 |
| AL4DZ-56                          | 531  | 300 | 0.56 | 0.06320 | 5.1  | 0.18120 | 4.9  | 0.02080 | 2.4 | 0.00780 | 5.1  | 0.495 | 22 | 132.7 | 3.1 | 169.9 | 7.8  | 690 | 110 | 132.7 ± 3.1 |
| AL4DZ-22                          | 100  | 44  | 0.44 | 0.06080 | 11.2 | 0.17300 | 9.8  | 0.02080 | 4.3 | 0.00750 | 8.0  | 0.440 | 21 | 132.9 | 5.4 | 169.0 | 14.0 | 640 | 230 | 132.9 ± 5.4 |
| AL4DZ-49                          | 171  | 57  | 0.33 | 0.05510 | 7.8  | 0.16000 | 7.5  | 0.02110 | 2.8 | 0.00680 | 11.8 | 0.379 | 10 | 134.3 | 4.0 | 150.0 | 11.0 | 380 | 160 | 134.3 ± 4.0 |
| AL4DZ-37                          | 211  | 142 | 0.67 | 0.05940 | 9.9  | 0.18100 | 9.4  | 0.02110 | 3.3 | 0.00760 | 7.9  | 0.353 | 20 | 134.7 | 4.3 | 168.0 | 15.0 | 600 | 210 | 134.7 ± 4.3 |
| AL4DZ-13                          | 73   | 29  | 0.40 | 0.06800 | 13.5 | 0.20600 | 13.6 | 0.02170 | 3.2 | 0.00880 | 12.5 | 0.237 | 28 | 138.1 | 4.4 | 191.0 | 23.0 | 880 | 260 | 138.1 ± 4.4 |
| AL4DZ-102                         | 161  | 80  | 0.50 | 0.05460 | 10.3 | 0.17500 | 10.3 | 0.02300 | 3.5 | 0.00740 | 6.8  | 0.338 | 10 | 146.6 | 5.1 | 162.0 | 16.0 | 290 | 210 | 146.6 ± 5.1 |

<sup>238</sup>U and Th concentrations (ppm) were calculated in reference to trace element analysis of NIST 610 standard glass

<sup>1</sup>Corrected isotope ratios relative to the standard zircon age (Ontario 91500 = 1.06 Ga; Wiedenbeck et al., 1995). The 207Pb/206Pb ratios, ages and uncertainties are calculated as in Paton et al. (2011)

\*Isotope ratio uncertainties are in percentages and age uncertainties are reported at 2 sigma level. 2 sigma uncertainties propagated according to Paton et al. (2010)

\*\*Rho is the error correlation value defined as the uncertainty ratio (in percentage) of the isotopic ratios of 206Pb/238U and 207Pb/235U

\*\*\*Percentage of discordance obtained using the following equation  $100 * [(age\ 207Pb / 235U) - (age\ 206Pb / 238U)] / (age\ 207Pb / 235U)$  proposed by Ludwig (2001). Positive and negative values indicate normal discordance and inverse discordance

TABLE DR2. PALEOMAGNETIC DATABASE

|                       |                                  |                                            |          |           |                        | Results parametrisch sampling or combining sites |       |      |      |      |       |                        |       |                   |  |
|-----------------------|----------------------------------|--------------------------------------------|----------|-----------|------------------------|--------------------------------------------------|-------|------|------|------|-------|------------------------|-------|-------------------|--|
| Name site in database | Author                           | site name/number in original paper         | site lat | site long | age                    | N                                                | Dec   | ΔDx  | Inc  | ΔIx  | k     | <i>a</i> <sub>95</sub> | K     | A95min<A95<A95max |  |
| Böhnell89-3           | Böhnell et al., 1989             | 35                                         | 19.35    | -104.72   | Early Cretaceous       | 9                                                | 276.4 | 17.7 | 44.8 | 19.8 | 15.5  | 13.5                   | 11.6  | 5.0<15.8<20.5     |  |
| Böhnell89-6           | Böhnell et al., 1989             | 43, 45, 48-51, 55                          | 19.14    | -103.36   | Maastrichtian          | 7                                                | 331.2 | 16.8 | 30.3 | 26.1 | 9.0   | 21.2                   | 15.0  | 5.5<16.1<24.1     |  |
| Böhnell89-7           | Böhnell et al., 1989             | 56, 57, 59, 60, 66-73                      | 19.14    | -103.36   | Aptian                 | 19                                               | 309.6 | 11.0 | 21.9 | 19.2 | 6.6   | 14.2                   | 10.7  | 3.7<10.7<12.8     |  |
| Bohnell89-8-n         | Böhnell et al., 1989             | 58, 64, 65, 74-76                          | 19.14    | -103.36   | Albian                 | 7                                                | 330.5 | 21.6 | 58.1 | 15.3 | 26.2  | 12.0                   | 14.1  | 5.5<16.6<24.1     |  |
| Böhnell89-9           | Böhnell et al., 1989             | 93                                         | 18.00    | -101.2    | 61±1 - 42 ±1 Ma        | 6                                                | 38.0  | 17.5 | 52.3 | 15.5 | 32.7  | 11.9                   | 21.9  | 5.9<14.6<26.5     |  |
| Molina Garza03        | Molina Garza et al., 2003        | Morelos & Mezcalera Fm - all sites         | 17.83    | -99.56    | Conacian-Maastrichtian | 18                                               | 324.7 | 2.6  | 35.9 | 3.6  | 207.1 | 2.4                    | 199.6 | 3.8>2.5<13.3*     |  |
| Andreani14-1-n        | Andreani et al., 2014            | ARB02-03, AST01-03, BAR02-03, BLE09,11,    | 21.80    | -100.9    | 29 ± 4 Ma              | 20                                               | 336.9 | 9.5  | 34.8 | 13.6 | 12.7  | 9.5                    | 14.2  | 3.6<9.0<12.4      |  |
|                       |                                  | GOC01, OCA01, SM01-08, 10-15, VDR01-04     |          |           |                        |                                                  |       |      |      |      |       |                        |       |                   |  |
|                       |                                  | ALF-1-03, ARP01-08, DMG01-03,05-09, LOB01- |          |           |                        |                                                  |       |      |      |      |       |                        |       |                   |  |
| Andreani14-2-n        | Andreani et al., 2015            | 04                                         | 21.00    | -101.4    | 32 ± 4 Ma              | 18                                               | 345.2 | 5.7  | 35.7 | 7.9  | 28.2  | 6.6                    | 43.2  | 3.8<5.3<13.3      |  |
| Molina-Garza06        | Molina-Garza & Orega-Rivera 2006 | all sites                                  | 18.18    | -99.58    | 37-32 Ma               | 18                                               | 346.4 | 4.8  | 34.3 | 6.9  | 54.8  | 4.7                    | 59.9  | 3.8<4.5<13.3      |  |
| Rosas-Elguera11       | Rosas-Elguera et al., 2011       | andesitic dykes - all sites                | 19.30    | -102.5    | 35.0 ± 1.8 Ma / Eocene | 12                                               | 345.0 | 8.4  | 33.1 | 12.3 | 24.6  | 8.9                    | 30.8  | 4.4<7.9<17.1      |  |
| Goguitchaichvili03-n  | Goguitchaichvili et al., 2003    | volcanics - all sites                      | 20.00    | -104.25   | 64.7 ± 1.2 Ma          | 14                                               | 330.7 | 6.9  | 44.2 | 7.9  | 45.4  | 6.0                    | 41.8  | 4.2<6.2<15.6      |  |

\* This dataset represent a dated remagnetisation event, resulting in a high k value, and a A95 smaller than the A95min. For a remagnetization data set, the Deenen et al., 2011 criteria are not applicable.
